# Supplementary material for: Corra: Computational framework and tools for LC-MS discovery and targeted mass spectrometry-based proteomics
Source: Springer Nature journal article supplement (doi:10.1186/1471-2105-9-542), 2008-12-01
Supplement: 12859_2008_2527_MOESM3_ESM.pdf [file 12859_2008_2527_MOESM3_ESM.pdf]

## All Classes

## Packages

[org.systemsbioinformatics.apps\\_utils](#)  
[org.systemsbioinformatics.apps\\_utils\\_targetanalysis](#)  
[org.systemsbioinformatics.libs.apmlparser](#)  
[org.systemsbioinformatics.libs.io](#)

## org.systemsbioinformatics.libs.apmlparser

## Classes

[AlignedFeature](#)  
[Alignment](#)  
[AlignmentHandler](#)  
[APML](#)  
[APMLElement](#)  
[APMLElementName](#)  
[APMLParser](#)  
[APMLSAXHandler](#)  
[APMLValidator](#)  
[Cluster](#)  
[ClusterProfile](#)  
[ClusterProfileHandler](#)  
[ClusterProfileParser](#)  
[Coordinate](#)  
[DataProcessing](#)  
[DataProcessingHandler](#)  
[ElutionProfile](#)  
[Feature](#)  
[FeatureSourceListParser](#)  
[GenericAttribute](#)  
[Modification](#)  
[PeakList](#)  
[PeakListHandler](#)  
[ProfileData](#)  
[PutativePeptideId](#)  
[Range](#)  
[Source](#)  
  
 Enums  
[APMLParser\\_HANDLER\\_TYPE](#)  
[ProcessStatus](#)

[Overview](#) **Package** [Class](#) [Use Tree](#) [Deprecated](#) [Index](#) [Help](#)
[PREV PACKAGE](#) [NEXT PACKAGE](#)
[FRAMES](#) [NO FRAMES](#)

## Package org.systemsbioinformatics.libs.apmlparser

### Class Summary

|                                         |                                                                                                                                                                       |
|-----------------------------------------|-----------------------------------------------------------------------------------------------------------------------------------------------------------------------|
| <a href="#">AlignedFeature</a>          | AlignedFeature is a class for single aligned feature.                                                                                                                 |
| <a href="#">Alignment</a>               | Alignment is a class for a single alignment containing features from multiple LCMS runs                                                                               |
| <a href="#">AlignmentHandler</a>        |                                                                                                                                                                       |
| <a href="#">APML</a>                    | APML is a container object for top apml elements in APML.                                                                                                             |
| <a href="#">APMLElement</a>             | APMLElement is a class for all APML element container classes.                                                                                                        |
| <a href="#">APMLElementName</a>         | APMLElementName contains all String type of APML Elements, therefore, if there is any update of element string name, APMLElementName is the only place to be updated. |
| <a href="#">APMLParser</a>              | APMLParser is for parsing APML file.                                                                                                                                  |
| <a href="#">APMLSAXHandler</a>          | APMLSAXHandlerI should be implemented in all APML SAX Handler classes.                                                                                                |
| <a href="#">APMLValidator</a>           | APMLValidator is a class to validate APML syntax based on more detailed schema.                                                                                       |
| <a href="#">Cluster</a>                 | Cluster is a container class for Cluster element which lists all the reference features used to make consensus cluster profile.                                       |
| <a href="#">ClusterProfile</a>          | ClusterProfile is a container class for Cluster element which is collection of an type of "theoretical" or "expected" trend profile.                                  |
| <a href="#">ClusterProfileHandler</a>   | ClusterProfileHandler is APMLSAXHandler for parse apml and create ClusterProfile object.                                                                              |
| <a href="#">ClusterProfileParser</a>    | Class is parsing Cluster element using STAX parser.                                                                                                                   |
| <a href="#">Coordinate</a>              | Coordinate contains the coordinates of each feature                                                                                                                   |
| <a href="#">DataProcessing</a>          | DataProcessing is a container class for dataProcessing element.                                                                                                       |
| <a href="#">DataProcessingHandler</a>   | DataProcessingHandler is APMLSAXHandler for parse apml and create DataProcessing object.                                                                              |
| <a href="#">ElutionProfile</a>          | ElutionProfile is a container class for elution_profile element which is collection of MS 1 elution profile given a feature and used for APML viewer.                 |
| <a href="#">Feature</a>                 | Feature is a single feature for a putative peptide.                                                                                                                   |
| <a href="#">FeatureSourceListParser</a> | Class is parsing feature_source_list element using STAX parser.                                                                                                       |
| <a href="#">GenericAttribute</a>        | GenericAttribute is a class for generic name, value and type attribute set.                                                                                           |
| <a href="#">Modification</a>            | Modification is a class for information on amino acid modification                                                                                                    |
| <a href="#">PeakList</a>                | PeakList is a container of peak_list element which is a collection of peaks peaked by a single LCMS run.                                                              |
| <a href="#">PeakListHandler</a>         | PeakListHandler is APMLSAXHandler for parse apml and create PeakList object.                                                                                          |
| <a href="#">ProfileData</a>             | ProfileData is a container class for profile_data element in APML, which is collection of consists of cluster profile                                                 |
