# Supplementary material for: Corra: Computational framework and tools for LC-MS discovery and targeted mass spectrometry-based proteomics
Source: Springer Nature journal article supplement (doi:10.1186/1471-2105-9-542), 2008-12-01
Supplement: 12859_2008_2527_MOESM4_ESM.pdf [file 12859_2008_2527_MOESM4_ESM.pdf]

(A)

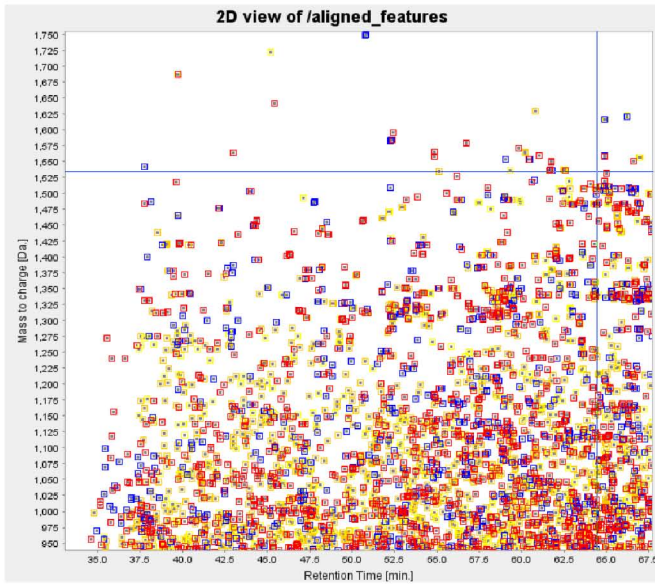

LC-MS INFO:

LC-MS name: aligned\_features  
# MS1 features: 22160  
# MS2 Ideal features: 0

| LC-MS Name       | ID | Nb Features | View                                |
|------------------|----|-------------|-------------------------------------|
| DeletionStrain_1 | 0  | 15694       | <input checked="" type="checkbox"/> |
| DeletionStrain_2 | 1  | 18034       | <input checked="" type="checkbox"/> |
| DeletionStrain_3 | 2  | 15693       | <input checked="" type="checkbox"/> |
| WildType_1       | 3  | 16471       | <input checked="" type="checkbox"/> |
| WildType_2       | 4  | 16026       | <input checked="" type="checkbox"/> |
| WildType_3       | 5  | 16327       | <input checked="" type="checkbox"/> |

PLOTTING TOOL BAR

Select plot view:

Times Aligned View

View Feature List

(B)

Feature Summary

AMRT info:

m/z = 1629.6097 [Da]  
Tr = 60.8000 [min.]  
z = 4 [Da]

MS2 info:

[no MS2 information available]

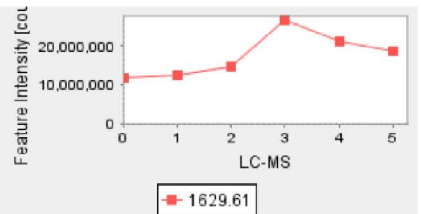

Feature Table:

| LCMS | Area     | edit | view                                |
|------|----------|------|-------------------------------------|
| 0    | 1.18E+07 | go   | <input checked="" type="checkbox"/> |
| 1    | 1.26E+07 | go   | <input checked="" type="checkbox"/> |
| 2    | 1.49E+07 | go   | <input checked="" type="checkbox"/> |
| 3    | 2.66E+07 | go   | <input checked="" type="checkbox"/> |
| 4    | 2.14E+07 | go   | <input checked="" type="checkbox"/> |

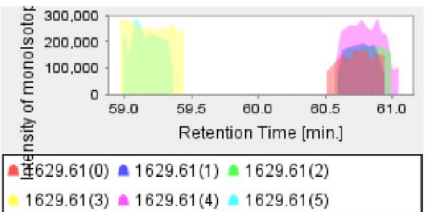

Tr view:

Aligned Tr view
