# Supplementary material for: Corra: Computational framework and tools for LC-MS discovery and targeted mass spectrometry-based proteomics
Source: Springer Nature journal article supplement (doi:10.1186/1471-2105-9-542), 2008-12-01
Supplement: 12859_2008_2527_MOESM5_ESM.pdf [file 12859_2008_2527_MOESM5_ESM.pdf]

A)

Corra  
A LC-MS FRAMEWORK AND COMPUTATIONAL TOOLS FOR DISCOVERY AND TARGETED ANALYSIS

Projects

- Diabetes96
- FT\_Yeast
- G1C2P2T24
- G1C2P2T6
- G1Q2C1T2
- G2C2P2T2
- G2C2P2T4
- G2C2P2T6
- G3C2P2T4
- G3C2P2T6
- Hs5787HP24vsNM24
- Hs5787HP6vsNM6
- MCF7HP24vsNM24
- MCF7HP6vsNM6
- NIDDK
  - Feature Picking
  - Alignment
  - Statistical Analysis
- GC Serum

Project: **NIDDK**  
Date: 10/26/2007

Project Setup **Feature Picking** Alignment Statistical Analysis

MS Instrument: QTOF

mzXML files:

pepXML files: NO FILES SELECTED

Sample Information:

Condition1: Condition\_1 Condition2: Condition\_2

Max. Replicate Count: 3

Time1: 1

| FileID                   | File Name                   | Sample ID | Condition   | MS Replicate | Time Point |
|--------------------------|-----------------------------|-----------|-------------|--------------|------------|
| <input type="checkbox"/> | Jan_09_2007_LeTate_12.mzXML | 0         | Condition_1 | 1            | 1          |
| <input type="checkbox"/> | Jan_09_2007_LeTate_14.mzXML | 1         | Condition_1 | 1            | 1          |

Import Sample Information File

B)

Corra  
A LC-MS FRAMEWORK AND COMPUTATIONAL TOOLS FOR DISCOVERY AND TARGETED ANALYSIS

Projects

- Bemd\_kinase
- Human\_Diabetes
- Bemd\_Kinase\_RTC2
- OVCell
- OVCell\_SpecArray
- Urine0806
- niddk\_SA
- niddk\_SH

Results:

Volcano Plot

Log Odds

Log Fold Change

Download pdf

Clustering Analysis

Hierarchical Cluster on all common features (588) of 66 runs with  $q \geq 1$

Height

Download pdf
