# Supplementary material for: Corra: Computational framework and tools for LC-MS discovery and targeted mass spectrometry-based proteomics
Source: Springer Nature journal article supplement (doi:10.1186/1471-2105-9-542), 2008-12-01

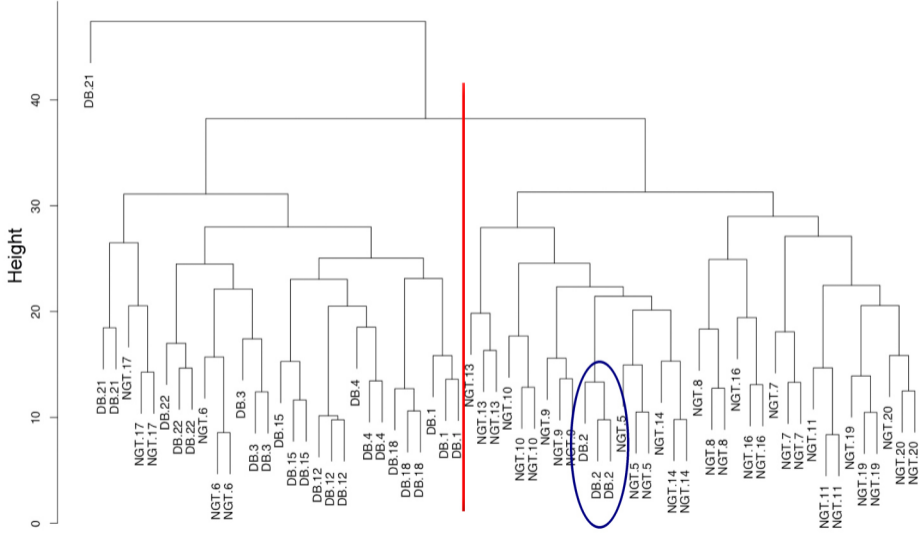

Supplement: 12859_2008_2527_MOESM7_ESM.pdf [file 12859_2008_2527_MOESM7_ESM.pdf]
